# Supplementary material for: National substance use patterns on Twitter
Source: PubMed Central journal article supplement (PMC5673183; doi:10.1371/journal.pone.0187691), 2017-11-06
Supplement: pone.0187691.s003.pdf [file pone.0187691.s003.pdf]

**S1 Table. Percent of substance-related tweets that are happy, by state**

| <i>State</i>         | <i>Alcohol</i> | <i>Smoking</i> | <i>Drug</i> |
|----------------------|----------------|----------------|-------------|
| Alabama              | 35%            | 21%            | 11%         |
| Arizona              | 32%            | 36%            | 12%         |
| Arkansas             | 35%            | 19%            | 11%         |
| California           | 35%            | 25%            | 12%         |
| Colorado             | 38%            | 25%            | 16%         |
| Connecticut          | 48%            | 28%            | 10%         |
| Delaware             | 35%            | 11%            | 7%          |
| District of Columbia | 36%            | 32%            | 11%         |
| Florida              | 36%            | 27%            | 13%         |
| Georgia              | 32%            | 23%            | 12%         |
| Idaho                | 34%            | 29%            | 7%          |
| Illinois             | 41%            | 24%            | 13%         |
| Indiana              | 34%            | 19%            | 13%         |
| Iowa                 | 34%            | 28%            | 13%         |
| Kansas               | 30%            | 36%            | 10%         |
| Kentucky             | 39%            | 27%            | 14%         |
| Louisiana            | 27%            | 23%            | 10%         |
| Maine                | 39%            | 23%            | 13%         |
| Maryland             | 36%            | 25%            | 11%         |
| Massachusetts        | 35%            | 20%            | 12%         |
| Michigan             | 37%            | 20%            | 10%         |
| Minnesota            | 35%            | 16%            | 14%         |
| Mississippi          | 29%            | 27%            | 14%         |
| Missouri             | 33%            | 25%            | 13%         |
| Montana              | 40%            | 27%            | 16%         |
| Nebraska             | 35%            | 54%            | 12%         |
| Nevada               | 34%            | 30%            | 14%         |
| New Hampshire        | 38%            | 19%            | 13%         |
| New Jersey           | 36%            | 27%            | 12%         |
| New Mexico           | 33%            | 37%            | 12%         |
| New York             | 39%            | 22%            | 12%         |
| North Carolina       | 40%            | 24%            | 13%         |
| North Dakota         | 28%            | 33%            | 11%         |
| Ohio                 | 36%            | 26%            | 12%         |
| Oklahoma             | 28%            | 31%            | 9%          |
| Oregon               | 36%            | 26%            | 16%         |
| Pennsylvania         | 38%            | 30%            | 13%         |

|                |     |     |     |
|----------------|-----|-----|-----|
| Rhode Island   | 34% | 21% | 17% |
| South Carolina | 35% | 27% | 13% |
| South Dakota   | 32% | 40% | 35% |
| Tennessee      | 37% | 40% | 11% |
| Texas          | 30% | 28% | 12% |
| Utah           | 30% | 20% | 11% |
| Vermont        | 40% | 9%  | 11% |
| Virginia       | 33% | 22% | 13% |
| Washington     | 34% | 47% | 16% |
| West Virginia  | 34% | 20% | 16% |
| Wisconsin      | 37% | 23% | 11% |
| Wyoming        | 30% | 17% | 15% |

---
